# Supplementary material for: Stability of the Inclusion Complexes of Dodecanoic Acid with α-Cyclodextrin, β-Cyclodextrin and 2-HP-β-Cyclodextrin
Source: MDPI journal article supplement (doi:10.3390/molecules28073113), 2023-03-30
Supplement: s1 [file s1]

# Stability of the inclusion complexes of dodecanoic acid with $\alpha$ -cyclodextrin, $\beta$ -cyclodextrin and 2-HP- $\beta$ -cyclodextrin

Zdzisław Kinart

Department of Physical Chemistry, Faculty of Chemistry, University of Lodz,  
Pomorska 163/165, 90-236 Lodz, Poland; [zdzislaw.kinart@chemia.uni.lodz.pl](mailto:zdzislaw.kinart@chemia.uni.lodz.pl)

**Table S1.** Densities, viscosities and relative permittivities of pure water at temperatures  $T = (288.15 \text{ to } 318.15)\text{K}$ .

| T/K    | $\rho_o/\text{kg}\cdot\text{m}^{-3}$ <sup>a</sup> | $10^3\cdot\eta/\text{Pa}\cdot\text{s}$ <sup>a</sup> | $\epsilon_r$ <sup>b</sup> |
|--------|---------------------------------------------------|-----------------------------------------------------|---------------------------|
| 283.15 | 999.700                                           | 1.130                                               | 83.95                     |
| 288.15 | 999.100                                           | 1.138                                               | 82.07                     |
| 293.15 | 998.205                                           | 1.002                                               | 80.21                     |
| 298.15 | 997.047                                           | 0.890                                               | 78.40                     |
| 303.15 | 995.651                                           | 0.797                                               | 76.62                     |
| 308.15 | 994.038                                           | 0.719                                               | 74.89                     |
| 313.15 | 992.224                                           | 0.653                                               | 73.19                     |
| 318.15 | 990.223                                           | 0.596                                               | 71.53                     |

<sup>a</sup> values for water recommended by the International Association for the Properties of Water and Steam (IAPWS) calculated on the online property calculator ([https://web1.hszg.de/thermo\\_fpc/](https://web1.hszg.de/thermo_fpc/))

<sup>b</sup> values for water calculated according to the IAPWS recommendations (<http://www.iapws.org/relguide/dielec.pdf>)

**Table S2.** The value of molar concentration of salt  $C_{\text{salt}}$  [mol/dm<sup>3</sup>], concentration of ligand  $C_{\text{lig}}$  [mol/dm<sup>3</sup>], molar conductivity  $\Lambda$  [S·cm<sup>2</sup>·mol<sup>-1</sup>] for  $\beta$ -cyclodextrin with trans-cinnamic acid sodium salt in water at all tested temperatures at pressure  $p = 0.1$  MPa.<sup>a</sup>

| sodium salt dodecanoic acid with $\alpha$ -cyclodextrin |                                             |                                            |                                                        |                                                        |                                                        |                                                        |                                                        |                                                        |                                                        |                                                        |
|---------------------------------------------------------|---------------------------------------------|--------------------------------------------|--------------------------------------------------------|--------------------------------------------------------|--------------------------------------------------------|--------------------------------------------------------|--------------------------------------------------------|--------------------------------------------------------|--------------------------------------------------------|--------------------------------------------------------|
| T [K]                                                   |                                             |                                            | 283.15                                                 | 288.15                                                 | 293.15                                                 | 298.15                                                 | 303.15                                                 | 308.15                                                 | 313.15                                                 | 318.15                                                 |
| Nr                                                      | $C_{\text{salt}}$<br>[mol/dm <sup>3</sup> ] | $C_{\text{lig}}$<br>[mol/dm <sup>3</sup> ] | $\Lambda_m$<br>[S·cm <sup>2</sup> ·mol <sup>-1</sup> ] |
| 1.                                                      | 0.00306                                     | 0.00000                                    | 46.3673                                                | 53.9311                                                | 61.8371                                                | 68.8551                                                | 75.8551                                                | 82.4197                                                | 87.1585                                                | 97.4252                                                |
| 2.                                                      | 0.00302                                     | 0.00022                                    | 45.8558                                                | 53.6049                                                | 61.2358                                                | 67.7139                                                | 74.7139                                                | 81.0494                                                | 86.3254                                                | 95.9535                                                |
| 3.                                                      | 0.00300                                     | 0.00032                                    | 45.6797                                                | 53.2061                                                | 60.9261                                                | 66.4466                                                | 73.4466                                                | 79.9996                                                | 85.7408                                                | 95.4152                                                |
| 4.                                                      | 0.00297                                     | 0.00046                                    | 45.3341                                                | 52.8730                                                | 60.5521                                                | 65.2202                                                | 72.2202                                                | 79.0779                                                | 85.0545                                                | 94.5171                                                |
| 5.                                                      | 0.00295                                     | 0.00059                                    | 45.0517                                                | 52.5449                                                | 60.1879                                                | 63.9763                                                | 70.9763                                                | 78.0714                                                | 84.2807                                                | 93.6089                                                |
| 6.                                                      | 0.00291                                     | 0.00076                                    | 44.6472                                                | 52.1360                                                | 59.7004                                                | 62.7339                                                | 69.7339                                                | 76.5916                                                | 83.5244                                                | 92.7124                                                |
| 7.                                                      | 0.00288                                     | 0.00090                                    | 44.3757                                                | 51.7832                                                | 59.3098                                                | 61.5588                                                | 68.5588                                                | 75.0721                                                | 82.7432                                                | 91.7931                                                |
| 8.                                                      | 0.00285                                     | 0.00105                                    | 44.0327                                                | 51.4444                                                | 58.8821                                                | 60.4393                                                | 67.4393                                                | 73.6685                                                | 82.0511                                                | 90.7446                                                |
| 9.                                                      | 0.00282                                     | 0.00120                                    | 43.7041                                                | 51.0464                                                | 58.3642                                                | 59.5847                                                | 66.5847                                                | 72.4074                                                | 81.3165                                                | 89.9063                                                |
| 10.                                                     | 0.00278                                     | 0.00141                                    | 43.1879                                                | 50.4454                                                | 57.8724                                                | 59.0365                                                | 66.0365                                                | 71.4348                                                | 80.3239                                                | 88.5669                                                |
| 11.                                                     | 0.00274                                     | 0.00161                                    | 42.8435                                                | 49.9867                                                | 57.2607                                                | 58.7173                                                | 65.7173                                                | 70.7572                                                | 79.2810                                                | 87.3150                                                |
| 12.                                                     | 0.00270                                     | 0.00182                                    | 42.4606                                                | 49.5077                                                | 56.6228                                                | 58.5134                                                | 65.5134                                                | 70.3576                                                | 78.3524                                                | 86.0544                                                |
| 13.                                                     | 0.00267                                     | 0.00199                                    | 42.0663                                                | 49.0600                                                | 56.1162                                                | 58.3841                                                | 65.3841                                                | 70.1632                                                | 77.3657                                                | 84.9440                                                |
| 14.                                                     | 0.00263                                     | 0.00221                                    | 41.7411                                                | 48.6917                                                | 55.5630                                                | 58.2750                                                | 65.2750                                                | 69.9821                                                | 76.3964                                                | 84.0596                                                |
| 15.                                                     | 0.00257                                     | 0.00249                                    | 41.4513                                                | 48.2900                                                | 54.9675                                                | 58.1947                                                | 65.1947                                                | 69.8296                                                | 75.4091                                                | 82.8867                                                |
| 16.                                                     | 0.00251                                     | 0.00278                                    | 41.2379                                                | 48.0065                                                | 54.5344                                                | 58.1369                                                | 65.1369                                                | 69.7207                                                | 74.5524                                                | 82.0612                                                |
| 17.                                                     | 0.00245                                     | 0.00309                                    | 41.1087                                                | 47.9446                                                | 54.2885                                                | 58.0984                                                | 65.0984                                                | 69.6516                                                | 74.0355                                                | 81.4904                                                |
| 18.                                                     | 0.00239                                     | 0.00339                                    | 41.0466                                                | 47.8511                                                | 54.1508                                                | 58.0264                                                | 65.0264                                                | 69.5760                                                | 73.6723                                                | 81.0713                                                |
| 19.                                                     | 0.00234                                     | 0.00366                                    | 41.1051                                                | 47.8743                                                | 54.0979                                                | 57.9517                                                | 64.9517                                                | 69.5208                                                | 73.5069                                                | 80.7227                                                |
| 20.                                                     | 0.00228                                     | 0.00396                                    | 41.0893                                                | 47.8506                                                | 54.0093                                                | 57.9414                                                | 64.9414                                                | 69.4371                                                | 73.3432                                                | 80.4971                                                |
| 21.                                                     | 0.00221                                     | 0.00429                                    | 41.0617                                                | 47.8739                                                | 54.0033                                                | 57.8920                                                | 64.8920                                                | 69.4140                                                | 73.1653                                                | 80.2429                                                |
| 22.                                                     | 0.00215                                     | 0.00460                                    | 41.0855                                                | 47.8542                                                | 53.9557                                                | 57.8635                                                | 64.8635                                                | 69.3466                                                | 73.0055                                                | 79.9654                                                |
| 23.                                                     | 0.00209                                     | 0.00489                                    | 41.0431                                                | 47.8006                                                | 53.9283                                                | 57.8237                                                | 64.8237                                                | 69.3352                                                | 72.8917                                                | 79.7934                                                |
| 24.                                                     | 0.00203                                     | 0.00520                                    | 41.0808                                                | 47.7631                                                | 53.8857                                                | 57.7892                                                | 64.7892                                                | 69.2354                                                | 72.6195                                                | 79.5328                                                |
| 25.                                                     | 0.00197                                     | 0.00548                                    | 41.0818                                                | 47.8292                                                | 53.8484                                                | 57.7623                                                | 64.7623                                                | 69.1586                                                | 72.5472                                                | 79.3186                                                |
| 26.                                                     | 0.00192                                     | 0.00576                                    | 41.0877                                                | 47.8342                                                | 53.8012                                                | 57.7023                                                | 64.7023                                                | 69.0054                                                | 72.3917                                                | 79.2475                                                |
| 27.                                                     | 0.00186                                     | 0.00606                                    | 41.0371                                                | 47.9207                                                | 53.7936                                                | 57.6533                                                | 64.6533                                                | 68.9723                                                | 72.3087                                                | 78.9683                                                |
| 28.                                                     | 0.00180                                     | 0.00636                                    | 41.0113                                                | 47.8029                                                | 53.7815                                                | 57.6124                                                | 64.6124                                                | 68.8932                                                | 72.1597                                                | 78.7736                                                |

<sup>a</sup>Standard uncertainties are  $u(T) = 0.01$  K,  $u(p) = 0.05$  MPa,  $u(c) = 10^{-4} \cdot c$ , and the combined expanded uncertainty is  $U_c(\Lambda) = 0.0005 \cdot \Lambda$  (level of confidence = 0.95).

**Table S3.** The value of molar concentration of salt  $C_{\text{salt}}$  [mol/dm<sup>3</sup>], concentration of ligand  $C_{\text{lig}}$  [mol/dm<sup>3</sup>], molar conductivity  $\Lambda$  [S·cm<sup>2</sup>·mol<sup>-1</sup>] for  $\beta$ -cyclodextrin with dodecanoic acid sodium salt in water at all tested temperatures.

| sodium salt dodecanoic acid with $\beta$ -cyclodextrin |                                             |                                            |                                                        |                                                        |                                                        |                                                        |                                                        |                                                        |                                                        |                                                        |
|--------------------------------------------------------|---------------------------------------------|--------------------------------------------|--------------------------------------------------------|--------------------------------------------------------|--------------------------------------------------------|--------------------------------------------------------|--------------------------------------------------------|--------------------------------------------------------|--------------------------------------------------------|--------------------------------------------------------|
| T [K]                                                  |                                             |                                            | 283.15                                                 | 288.15                                                 | 293.15                                                 | 298.15                                                 | 303.15                                                 | 308.15                                                 | 313.15                                                 | 318.15                                                 |
| Nr                                                     | $C_{\text{salt}}$<br>[mol/dm <sup>3</sup> ] | $C_{\text{lig}}$<br>[mol/dm <sup>3</sup> ] | $\Lambda_m$<br>[S·cm <sup>2</sup> ·mol <sup>-1</sup> ] |
| 1.                                                     | 0.00298                                     | 0.00000                                    | 45.2173                                                | 52.0673                                                | 58.2793                                                | 65.5795                                                | 73.8305                                                | 79.0645                                                | 85.7295                                                | 94.8508                                                |
| 2.                                                     | 0.00294                                     | 0.00023                                    | 44.7058                                                | 51.5558                                                | 57.7678                                                | 65.0680                                                | 73.3190                                                | 78.5530                                                | 85.2180                                                | 94.3393                                                |
| 3.                                                     | 0.00292                                     | 0.00030                                    | 44.5297                                                | 51.3797                                                | 57.5917                                                | 64.8919                                                | 73.1429                                                | 78.3769                                                | 85.0419                                                | 94.1632                                                |
| 4.                                                     | 0.00289                                     | 0.00044                                    | 44.1841                                                | 51.0341                                                | 57.2461                                                | 64.5463                                                | 72.7973                                                | 78.0313                                                | 84.6963                                                | 93.8176                                                |
| 5.                                                     | 0.00287                                     | 0.00059                                    | 43.9017                                                | 50.7517                                                | 56.9637                                                | 64.2639                                                | 72.5149                                                | 77.7489                                                | 84.4139                                                | 93.5352                                                |
| 6.                                                     | 0.00284                                     | 0.00073                                    | 43.4972                                                | 50.3472                                                | 56.5592                                                | 63.8594                                                | 72.1104                                                | 77.3444                                                | 84.0094                                                | 93.1307                                                |
| 7.                                                     | 0.00281                                     | 0.00088                                    | 43.2257                                                | 50.0757                                                | 56.2877                                                | 63.5879                                                | 71.8389                                                | 77.0729                                                | 83.7379                                                | 92.8592                                                |
| 8.                                                     | 0.00278                                     | 0.00105                                    | 42.8827                                                | 49.7327                                                | 55.9447                                                | 63.2449                                                | 71.4959                                                | 76.7299                                                | 83.3949                                                | 92.5162                                                |
| 9.                                                     | 0.00276                                     | 0.00118                                    | 42.5541                                                | 49.4041                                                | 55.6161                                                | 62.9163                                                | 71.1673                                                | 76.4013                                                | 83.0663                                                | 92.1876                                                |
| 10.                                                    | 0.00272                                     | 0.00139                                    | 42.0379                                                | 48.8879                                                | 55.0999                                                | 62.4001                                                | 70.6511                                                | 75.8851                                                | 82.5501                                                | 91.6714                                                |
| 11.                                                    | 0.00268                                     | 0.00160                                    | 41.6935                                                | 48.5435                                                | 54.7555                                                | 62.0557                                                | 70.3067                                                | 75.5407                                                | 82.2057                                                | 91.3270                                                |
| 12.                                                    | 0.00264                                     | 0.00180                                    | 41.3106                                                | 48.1606                                                | 54.3726                                                | 61.6728                                                | 69.9238                                                | 75.1578                                                | 81.8228                                                | 90.9441                                                |
| 13.                                                    | 0.00260                                     | 0.00201                                    | 40.9163                                                | 47.7663                                                | 53.9783                                                | 61.2785                                                | 69.5295                                                | 74.7635                                                | 81.4285                                                | 90.5498                                                |
| 14.                                                    | 0.00259                                     | 0.00218                                    | 40.5911                                                | 47.4411                                                | 53.6531                                                | 60.9533                                                | 69.2043                                                | 74.4383                                                | 81.1033                                                | 90.2246                                                |
| 15.                                                    | 0.00251                                     | 0.00248                                    | 40.3013                                                | 47.1513                                                | 53.3633                                                | 60.6635                                                | 68.9145                                                | 74.1485                                                | 80.8135                                                | 89.9348                                                |
| 16.                                                    | 0.00246                                     | 0.00277                                    | 40.0879                                                | 46.9379                                                | 53.1499                                                | 60.4501                                                | 68.7011                                                | 73.9351                                                | 80.6001                                                | 89.7214                                                |
| 17.                                                    | 0.00240                                     | 0.00306                                    | 39.9587                                                | 46.8087                                                | 53.0207                                                | 60.3209                                                | 68.5719                                                | 73.8059                                                | 80.4709                                                | 89.5922                                                |
| 18.                                                    | 0.00235                                     | 0.00336                                    | 39.8966                                                | 46.7466                                                | 52.9586                                                | 60.2588                                                | 68.5098                                                | 73.7438                                                | 80.4088                                                | 89.5301                                                |
| 19.                                                    | 0.00229                                     | 0.00369                                    | 39.9550                                                | 46.8050                                                | 53.0170                                                | 60.3172                                                | 68.5682                                                | 73.8022                                                | 80.4672                                                | 89.5885                                                |
| 20.                                                    | 0.00224                                     | 0.00395                                    | 39.9393                                                | 46.7893                                                | 53.0013                                                | 60.3015                                                | 68.5525                                                | 73.7865                                                | 80.4515                                                | 89.5728                                                |
| 21.                                                    | 0.00218                                     | 0.00425                                    | 39.9117                                                | 46.7617                                                | 52.9737                                                | 60.2739                                                | 68.5249                                                | 73.7589                                                | 80.4239                                                | 89.5452                                                |
| 22.                                                    | 0.00213                                     | 0.00454                                    | 39.9355                                                | 46.7855                                                | 52.9975                                                | 60.2977                                                | 68.5487                                                | 73.7827                                                | 80.4477                                                | 89.5690                                                |
| 23.                                                    | 0.00208                                     | 0.00481                                    | 39.8931                                                | 46.7431                                                | 52.9551                                                | 60.2553                                                | 68.5063                                                | 73.7403                                                | 80.4053                                                | 89.5266                                                |
| 24.                                                    | 0.00201                                     | 0.00515                                    | 39.9308                                                | 46.7808                                                | 52.9928                                                | 60.2930                                                | 68.5440                                                | 73.7780                                                | 80.4430                                                | 89.5643                                                |
| 25.                                                    | 0.00196                                     | 0.00543                                    | 39.9318                                                | 46.7818                                                | 52.9938                                                | 60.2940                                                | 68.5450                                                | 73.7790                                                | 80.4440                                                | 89.5653                                                |
| 26.                                                    | 0.00190                                     | 0.00573                                    | 39.9377                                                | 46.7877                                                | 52.9997                                                | 60.2999                                                | 68.5509                                                | 73.7849                                                | 80.4499                                                | 89.5712                                                |
| 27.                                                    | 0.00185                                     | 0.00601                                    | 39.8871                                                | 46.7371                                                | 52.9491                                                | 60.2493                                                | 68.5003                                                | 73.7343                                                | 80.3993                                                | 89.5406                                                |
| 28.                                                    | 0.00181                                     | 0.00622                                    | 39.8613                                                | 46.7113                                                | 52.9233                                                | 60.2235                                                | 68.4945                                                | 73.7185                                                | 80.3735                                                | 89.5148                                                |

**Table S4.** The value of molar concentration of salt  $C_{\text{salt}}$  [mol/dm<sup>3</sup>], concentration of ligand  $C_{\text{lig}}$  [mol/dm<sup>3</sup>], molar conductivity  $\Lambda$  [S·cm<sup>2</sup>·mol<sup>-1</sup>] for 2-HP- $\beta$ -cyclodextrin with dodecanoic acid sodium salt in water at all tested temperatures.

| sodium salt dodecanoic acid with 2-HP- $\beta$ -cyclodextrin |                                             |                                            |                                                        |                                                        |                                                        |                                                        |                                                        |                                                        |                                                        |                                                        |
|--------------------------------------------------------------|---------------------------------------------|--------------------------------------------|--------------------------------------------------------|--------------------------------------------------------|--------------------------------------------------------|--------------------------------------------------------|--------------------------------------------------------|--------------------------------------------------------|--------------------------------------------------------|--------------------------------------------------------|
| T [K]                                                        |                                             |                                            | 283.15                                                 | 288.15                                                 | 293.15                                                 | 298.15                                                 | 303.15                                                 | 308.15                                                 | 313.15                                                 | 318.15                                                 |
| Nr                                                           | $C_{\text{salt}}$<br>[mol/dm <sup>3</sup> ] | $C_{\text{lig}}$<br>[mol/dm <sup>3</sup> ] | $\Lambda_m$<br>[S·cm <sup>2</sup> ·mol <sup>-1</sup> ] |
| 1.                                                           | 0.00302                                     | 0.00000                                    | 44.3762                                                | 51.0412                                                | 56.9229                                                | 64.3586                                                | 71.0984                                                | 77.8936                                                | 84.4169                                                | 92.0083                                                |
| 2.                                                           | 0.00299                                     | 0.00020                                    | 43.8596                                                | 50.3616                                                | 56.1405                                                | 63.0593                                                | 69.9471                                                | 76.9880                                                | 83.0188                                                | 90.9240                                                |
| 3.                                                           | 0.00297                                     | 0.00033                                    | 43.5922                                                | 50.0081                                                | 55.6119                                                | 61.7282                                                | 69.3135                                                | 76.3365                                                | 82.3231                                                | 90.1554                                                |
| 4.                                                           | 0.00295                                     | 0.00052                                    | 43.2127                                                | 49.5715                                                | 55.0949                                                | 60.4869                                                | 68.4117                                                | 75.4494                                                | 81.6273                                                | 89.3318                                                |
| 5.                                                           | 0.00294                                     | 0.00061                                    | 42.9049                                                | 49.2003                                                | 54.5788                                                | 59.1901                                                | 67.8271                                                | 75.0263                                                | 80.6531                                                | 88.4962                                                |
| 6.                                                           | 0.00292                                     | 0.00074                                    | 42.5393                                                | 48.8021                                                | 54.0514                                                | 57.9340                                                | 66.9642                                                | 74.4679                                                | 79.8199                                                | 87.6191                                                |
| 7.                                                           | 0.00290                                     | 0.00088                                    | 42.2326                                                | 48.2434                                                | 53.4236                                                | 56.8068                                                | 66.4194                                                | 73.8350                                                | 78.8874                                                | 86.8030                                                |
| 8.                                                           | 0.00288                                     | 0.00102                                    | 41.7722                                                | 47.8890                                                | 52.8848                                                | 55.7046                                                | 65.5933                                                | 73.1282                                                | 78.3027                                                | 85.8701                                                |
| 9.                                                           | 0.00287                                     | 0.00113                                    | 41.4772                                                | 47.5172                                                | 52.3592                                                | 54.8014                                                | 64.8884                                                | 72.5909                                                | 77.3413                                                | 84.9845                                                |
| 10.                                                          | 0.00283                                     | 0.00141                                    | 40.9418                                                | 46.9407                                                | 51.5872                                                | 54.0595                                                | 63.8745                                                | 71.1932                                                | 76.2034                                                | 82.5445                                                |
| 11.                                                          | 0.00281                                     | 0.00163                                    | 40.4607                                                | 46.3527                                                | 50.8602                                                | 53.6007                                                | 62.9219                                                | 70.1248                                                | 75.1625                                                | 81.3427                                                |
| 12.                                                          | 0.00278                                     | 0.00184                                    | 40.0224                                                | 45.8560                                                | 50.1457                                                | 53.3147                                                | 62.0531                                                | 69.1486                                                | 73.9357                                                | 80.3113                                                |
| 13.                                                          | 0.00275                                     | 0.00204                                    | 39.5545                                                | 45.2348                                                | 49.4452                                                | 53.0856                                                | 61.2729                                                | 68.2963                                                | 72.7772                                                | 79.2875                                                |
| 14.                                                          | 0.00272                                     | 0.00231                                    | 39.1549                                                | 44.8061                                                | 48.7889                                                | 52.9267                                                | 60.6235                                                | 67.1964                                                | 71.9173                                                | 78.0327                                                |
| 15.                                                          | 0.00267                                     | 0.00267                                    | 38.4597                                                | 44.1491                                                | 48.0061                                                | 52.7792                                                | 59.8774                                                | 66.0144                                                | 70.5765                                                | 76.8927                                                |
| 16.                                                          | 0.00264                                     | 0.00293                                    | 38.1375                                                | 43.6424                                                | 47.3170                                                | 52.6703                                                | 59.3366                                                | 65.3646                                                | 69.4289                                                | 76.1261                                                |
| 17.                                                          | 0.00259                                     | 0.00329                                    | 37.8252                                                | 43.2597                                                | 46.8021                                                | 52.5872                                                | 58.9208                                                | 64.7589                                                | 68.6211                                                | 75.6232                                                |
| 18.                                                          | 0.00256                                     | 0.00355                                    | 37.6438                                                | 43.0187                                                | 46.4067                                                | 52.4999                                                | 58.6360                                                | 64.4852                                                | 68.0692                                                | 75.1438                                                |
| 19.                                                          | 0.00252                                     | 0.00387                                    | 37.5277                                                | 42.7813                                                | 46.0384                                                | 52.4337                                                | 58.4220                                                | 64.2090                                                | 67.5090                                                | 74.7990                                                |
| 20.                                                          | 0.00248                                     | 0.00417                                    | 37.3514                                                | 42.6102                                                | 45.7419                                                | 52.3615                                                | 58.2329                                                | 64.0110                                                | 67.2861                                                | 74.4679                                                |
| 21.                                                          | 0.00244                                     | 0.00448                                    | 37.1972                                                | 42.5235                                                | 45.5989                                                | 52.3083                                                | 58.0806                                                | 63.8468                                                | 67.0386                                                | 74.3791                                                |
| 22.                                                          | 0.00240                                     | 0.00476                                    | 37.1246                                                | 42.4230                                                | 45.3808                                                | 52.2533                                                | 57.9387                                                | 63.7291                                                | 66.8139                                                | 74.1293                                                |
| 23.                                                          | 0.00236                                     | 0.00506                                    | 37.0070                                                | 42.3289                                                | 45.1944                                                | 52.2352                                                | 57.8097                                                | 63.6188                                                | 66.6323                                                | 73.9686                                                |
| 24.                                                          | 0.00233                                     | 0.00533                                    | 36.9897                                                | 42.2571                                                | 44.9888                                                | 52.2032                                                | 57.6940                                                | 63.5100                                                | 66.3799                                                | 73.7655                                                |
| 25.                                                          | 0.00229                                     | 0.00564                                    | 36.9503                                                | 42.1919                                                | 44.8237                                                | 52.1895                                                | 57.5534                                                | 63.4215                                                | 66.1903                                                | 73.7441                                                |
| 26.                                                          | 0.00224                                     | 0.00602                                    | 36.9024                                                | 42.0642                                                | 44.5935                                                | 52.1721                                                | 57.5322                                                | 63.3306                                                | 65.9034                                                | 73.4474                                                |
| 27.                                                          | 0.00182                                     | 0.00623                                    | 36.8565                                                | 42.0252                                                | 44.5023                                                | 52.1435                                                | 57.4393                                                | 63.3652                                                | 65.8736                                                | 73.4165                                                |

**Table S5.** Values of parameters A, B, and C for  $\alpha$ -cyclodextrin,  $\beta$ -cyclodextrin and 2-HP- $\beta$ -cyclodextrin with sodium salt of dodecanoic acid in water at all tested temperatures

|                             | <b>A</b> | <b>B</b> | <b>C</b> |
|-----------------------------|----------|----------|----------|
| 2-HP- $\beta$ -cyclodextrin | 216835   | -1533.70 | 2.4638   |
| $\beta$ -cyclodextrin       | 102202   | -828.20  | 1.3760   |
| $\alpha$ -cyclodextrin      | 92268    | -772.77  | 1.2956   |
